# Supplementary material for: A comparison of foamy and lentiviral vector genotoxicity in SCID-repopulating cells shows foamy vectors are less prone to clonal dominance
Source: PubMed Central journal article supplement — Mol Ther Methods Clin Dev. 2016 Aug 17;3:16048–. doi: 10.1038/mtm.2016.48 (PMC4988344; doi:10.1038/mtm.2016.48), 2016-08-17
Supplement: mtm201648-s1.pdf [file mtm201648-s1.pdf]

**Supplementary Figure S1** In vitro marking analysis of FV and LV vector transduced CD34<sup>+</sup> cells. **(a)** Marking in CD34<sup>+</sup> cells maintained in liquid culture six and nine days post-transduction. **(b)** Progenitors expressing EGFP in the CFU assay. **(c)** Plating efficiency from CFU assay.

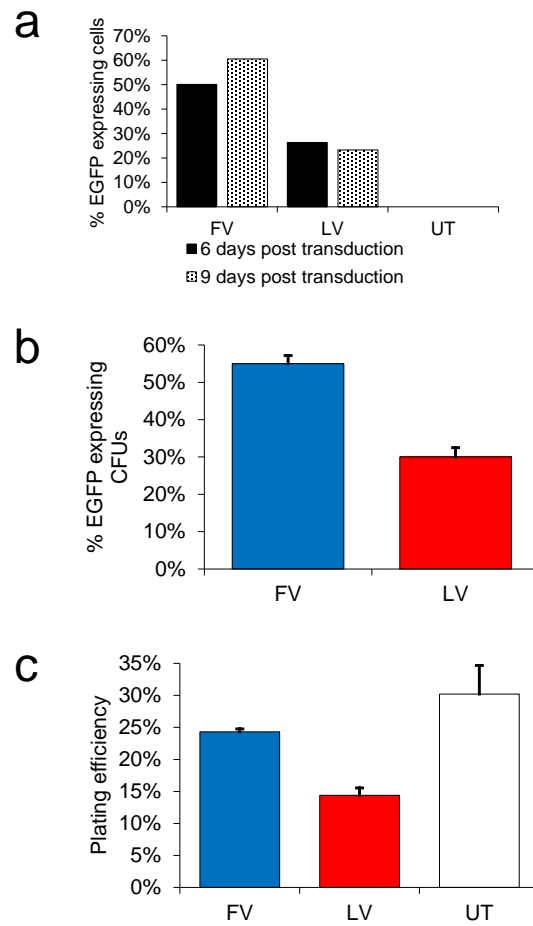



C.

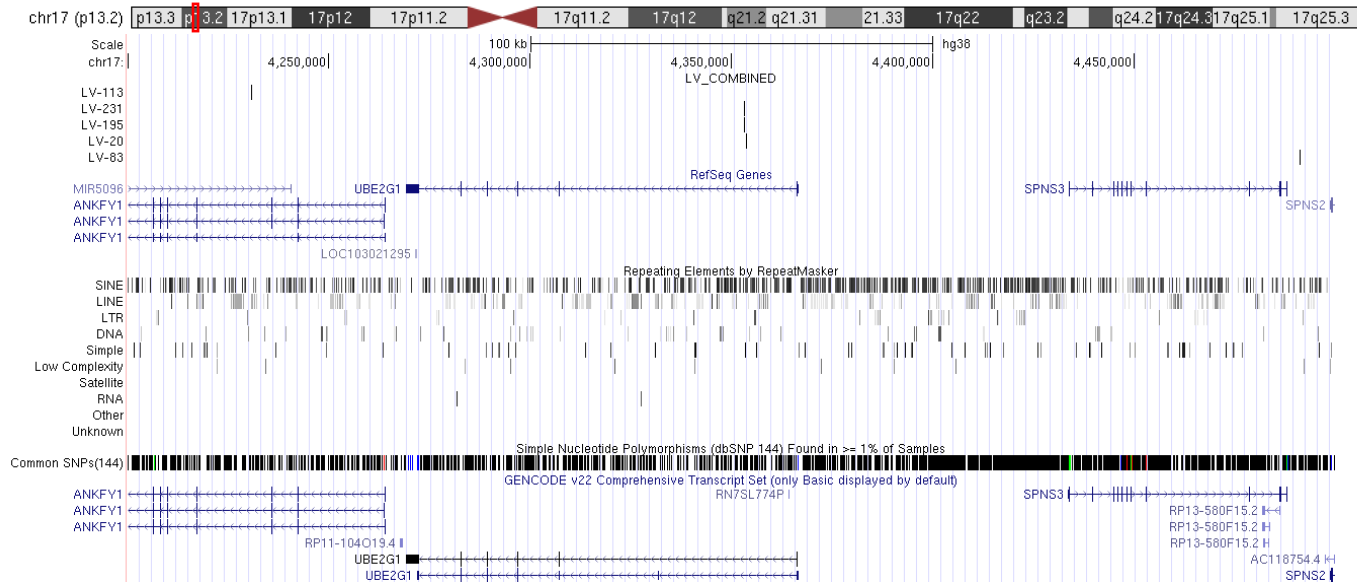



C.

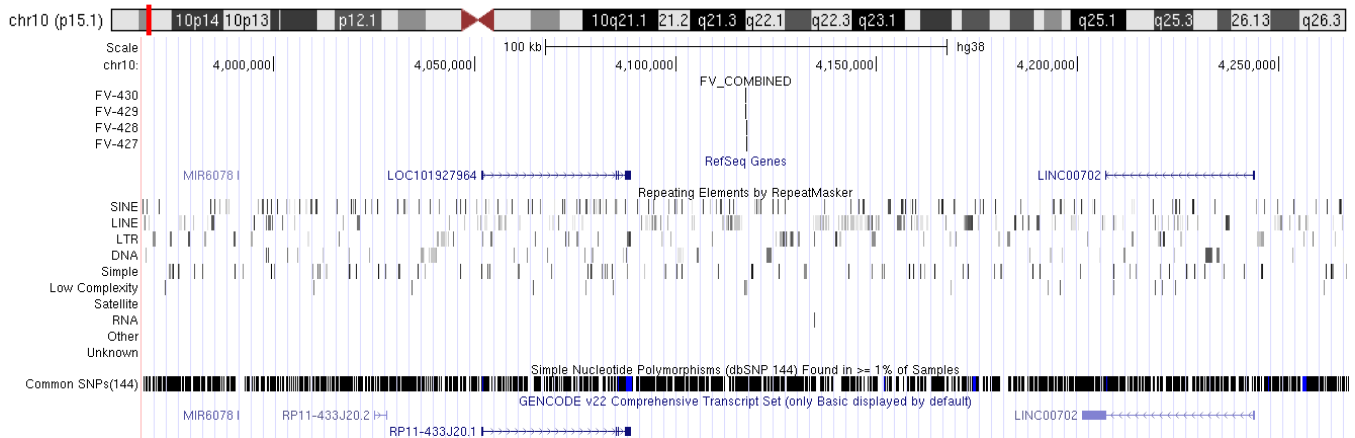

**Supplementary Figure S4.** Proviral integrations of dominant clones within 100 kb of proto-oncogenes mapped on the human genome using the UCSC genome browser (hg38). **(a)** Proviral integration sites mapped on the human genome. **(b)** The proviral LTR-chromosome junctions and query mapped on the human genome.

**4a1.** Proviral integration site in *MKL1* on chromosome 22.

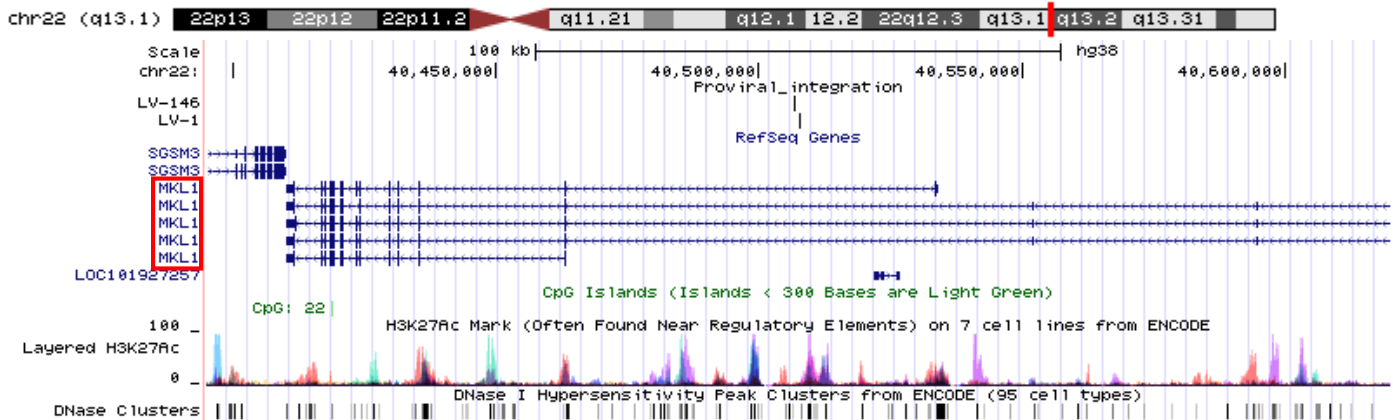

**4a2.** Proviral integration site near *RPS6KA1* on chromosome 1.

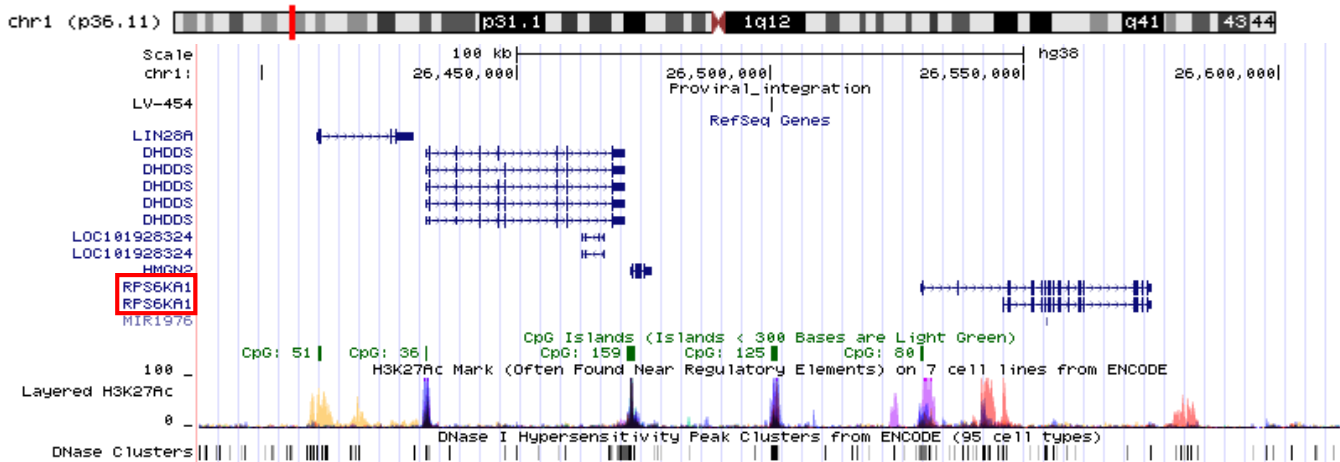

### 4a3. Proviral integration site near *CYP4F22* on chromosome 19.

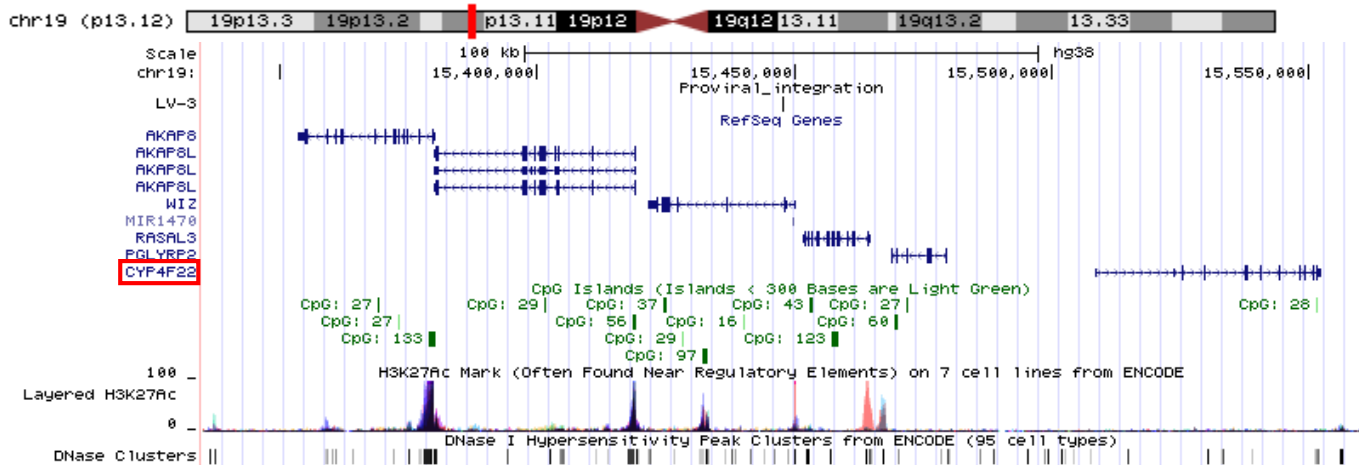

### 4a4. Proviral integration site near *FLT3* on chromosome 13.

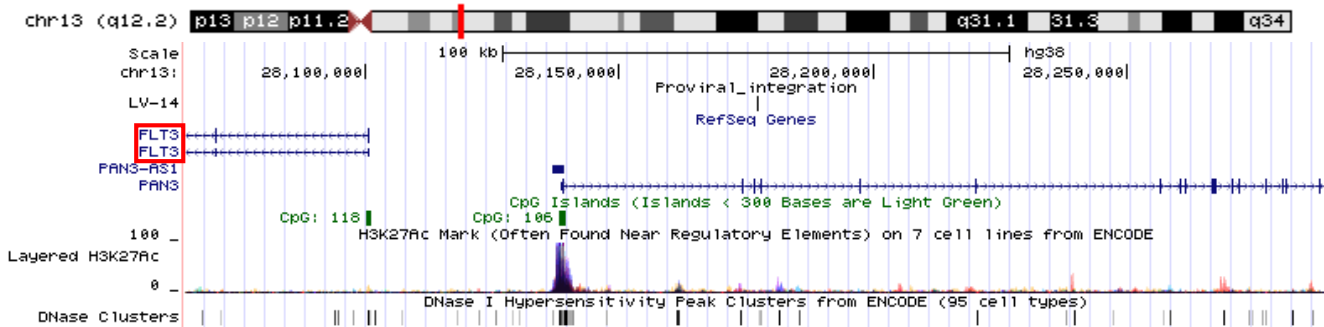

### 4a5. Proviral integration site near *MST1* on chromosome 3.

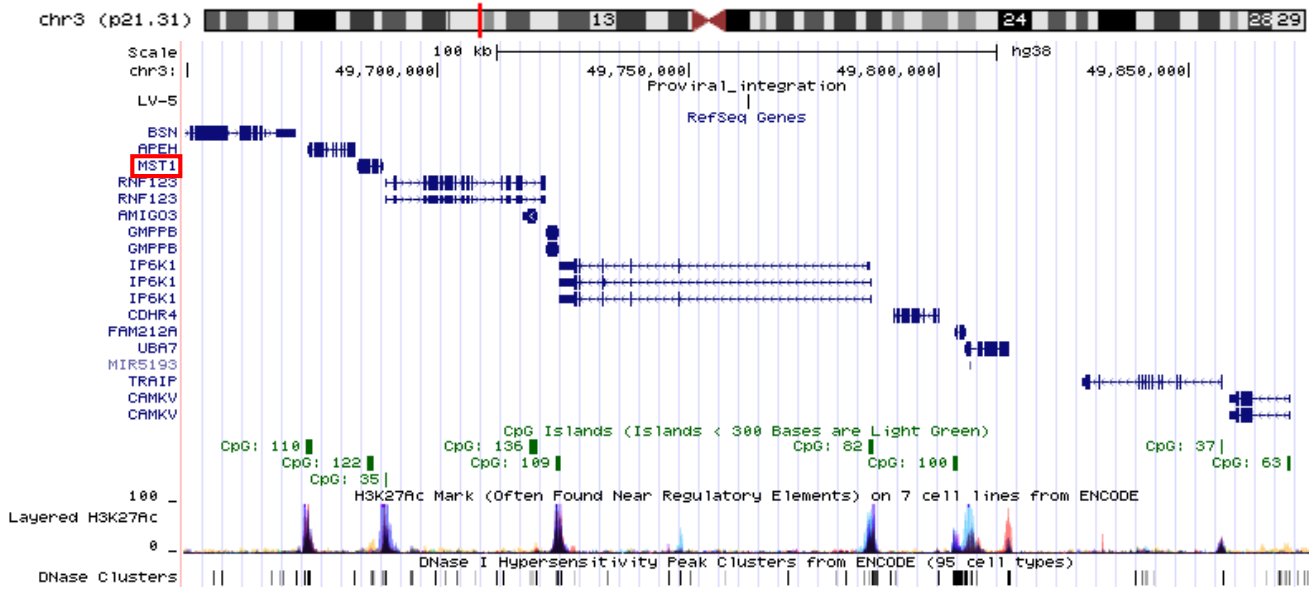



## 4b1. MKL1

### LTR-Chromosome junction sequence read

AGTGTGGAAAATCTCTAGCAAGGGGGGATCACTTGAGCCTGTCAAGGCTGCAGTGAGCTATGACGGTGCCACTGCACT  
CCCACCTGTGTGACAGAGCAAGGCCCTCTCTGAAAGAAAAAAAAAATTGTCCTAGATTAAGAACCCTGGGTTATT  
TCAAGGACTAAAGAAGTTGATTTAGGCCAGATGCAGTTGCNNACGCTTGTAAATCCCAGCACCTTAGGCCAAGGTGG  
TGGATCACGAGGTCAGGAATTAGAGACCAGCCTGACCAACATGGCGAAACCCCGTCTC

### Query sequence localized to chromosome 22 using BLAT

|            |             |            |            |             |          |
|------------|-------------|------------|------------|-------------|----------|
| ttcgagacca | gcctgggtaa  | catggcaaaa | tctgtctct  | aaaaagaata  | 40507477 |
| caaaaaatta | gaaggggtgcc | tcagtccta  | gctattagag | aggctgaggt  | 40507527 |
| GGGGGGATCA | CTTGAGCCTG  | TCAAGGCTGC | AGTGAGCTAT | GACGGTGCCA  | 40507577 |
| CTGCACTCCC | ACCTGTGTGA  | CAGAGCAAGG | CCCTCTCTGA | AAGAAAAAAAA | 40507627 |
| AAAATTGTCC | TAGATTAAGA  | ACCACTGGGT | TATTTCAAGG | ACTAAAGAAG  | 40507677 |
| TTGATTTAGG | CCAGATGCAG  | TTGTcACGC  | TTGTAATCCC | AGCACCTTAG  | 40507727 |
| GCCAAGGTGG | GTGGATCACG  | AGGTCAGGAA | TTAGAGACCA | GCCTGACCAA  | 40507777 |
| CATGGCGAAA | CCCCGTCTCt  | actaaaaata | caaaaattat | ccaggcatgg  | 40507827 |
| tgacacacac | ctgtagtccc  | agctaccagg | aaggctgagg | aatgagaatt  | 40507877 |
| gcttgaacc  | gggaggcag   |            |            |             |          |

## 4b2. RPS6KA1

### LTR-Chromosome junction sequence read

AGTGTGGAAAATCTCTAGCAATAACAAAACAAAAAAGCTGGTTGGTTGTTGGGAGGCCTGGCTGCTTTTGGGAAGG  
ATAATCCTCGTCCACACCAAGGTGATTTCAGTGAGCAGGGTGAGGGCAGATGCTGGGTGTCCACGCCCGGCCCCACA  
GCAGCCAGAGGAAGATACCAGCCCCGCGCACCCGTCGCCATGGCAACCTCAACCCCACTCCTGGACCCTAGCTCGGAA  
GGGGGCAGGGTATCGAAAGC

### Query sequence localized to chromosome 1 using BLAT

|            |            |            |            |            |          |
|------------|------------|------------|------------|------------|----------|
| gctggggctg | cgcgcggggg | cttatgcctg | taaccccagc | actttgggag | 26499978 |
| gacagcctgg | ccaacagagc | gagaccctat | ctctatTTTT | TTTTAAAAAA | 26500028 |
| ATAACAAAAC | AAAAAAGCT  | GGTTGGTTGT | TGGGAGGCCT | GGCTGCTTTT | 26500078 |
| GGGAAGGATA | ATCCTCGTCC | ACACCAAGGT | GATTCAGTGA | GCAGGGTGAG | 26500128 |
| GGCAGATGCT | GGGTGTCCAC | GCCCCGCCCC | CACAGCAGCC | AGAGGAAGAT | 26500178 |
| ACCAGCCCCG | GCACCCGTGC | CCATGGCAAC | CTCAACCCCA | CTCCTGGACC | 26500228 |
| CTAGCTCGGA | AGGGGGCAGG | GTATCGAAAG | Ccgatcgcca | gaggctcctc | 26500278 |
| ggtgcctcgt | gcgagtcccc | gccgtcagcc | ccgaggagcc | tcttggcacc | 26500328 |
| aagcagcgcg | tgcccccttc | ggccacacgg | t          |            |          |

### 4b3. CYP4F22

#### LTR-Chromosome junction sequence read

AGTGTGGAAAATCTCTAGCA**TTGTCCATTTCCCCTACTAGAGTGT**CAGCCCCTTGAGGGCAGGAATTCTTGCCTCTT  
TGGTTTACAGCTGTCTTCCCAGTGCCTAGCACATACCCTGGCACACCGAAGGTGCTCAGTATTTAATGAATGAATAA  
CACGTCTGGAGGTGGGGAGAGTGTGAGATACCTTTTTGCTGGGTAAACCAAGGGGTAGCCAGCATCGCTGACTACCC  
AGCCTCNCCCTAGCCACTACAGAAGCTGTTTTGGCCCGTGGTT**CAGGAACAGGATACACCCAGACAGCCAGAGGGAG**

#### Query sequence localized to chromosome 19 using BLAT

|                   |                   |                    |                   |                   |          |
|-------------------|-------------------|--------------------|-------------------|-------------------|----------|
| gagggctctcc       | caggtctccc        | aggcatgatc         | ctggcactct        | gtttaatgcc        | 15447398 |
| ttcacagcat        | ctgtcactac        | ctgtccttct         | gatatttggt        | tagttgcttg        | 15447448 |
| <b>TTGTCCATTT</b> | <b>CCCCTACTAG</b> | <b>AGTGT</b> CAGCC | <b>CCTTGAGGGC</b> | <b>AGGAATTCTT</b> | 15447498 |
| <b>GCCTCTTTGG</b> | <b>TTTACAGCTG</b> | <b>TCTTCCCAGT</b>  | <b>GCCTAGCACA</b> | <b>TACCCTGGCA</b> | 15447548 |
| <b>CACCGAAGGT</b> | <b>GCTCAGTATT</b> | <b>TAATGAATGA</b>  | <b>ATAACACGTC</b> | <b>TGGAGGTGGG</b> | 15447598 |
| <b>GAGAGTGTGA</b> | <b>GATACCTTTT</b> | <b>TGCTGGGTAA</b>  | <b>ACCAAGGGGT</b> | <b>AGCCAGCATC</b> | 15447648 |
| <b>GCTGACTACC</b> | <b>CAGCCTctCC</b> | <b>CTAGCCACTA</b>  | <b>CAGAAGCTGT</b> | <b>TTTGGCCCGT</b> | 15447698 |
| <b>GGTTCAGGAA</b> | <b>CAGGATACAC</b> | <b>CCAGACAGCC</b>  | <b>AGAGGGAGct</b> | <b>gggatagact</b> | 15447748 |
| gatgggagtg        | gggaatacct        | gtggaataag         | tgggctgggg        | gcagggagtc        | 15447798 |
| tggggtgctg        | agatgggcct        | ctggacccaa         | ttagtatg          |                   |          |

### 4b4. FLT3

#### LTR-Chromosome junction sequence read

AGTGTGGAAAATCTCTAGCA**CTTACCTTCATTA**AAATTAACATGAATTTAATATTAATAACTAATAGTGCAAAGAG  
CAAGATGTTAATAAAATAGCATGTTGAAATTTTTGTATATAACTTATACACTTTTCTTTTTTTTTTTAATAATAGAG  
ACATGGTCTTGTTATATTGNCNAAGTTGGTTTTCAA**ACTCCTGGGCTCAATCATTCTCCACCTGAGCCTCCCAA**

#### Query sequence localized to chromosome 13 using BLAT

|                   |                   |                   |                   |                   |          |
|-------------------|-------------------|-------------------|-------------------|-------------------|----------|
| attaaatgcc        | cttacgtaaa        | ggaaccttaa        | atctcttcac        | aatgtagtac        | 28177022 |
| atatagactg        | ctgcttcatt        | tctctgcctt        | cttcttctg         | gtttttcaga        | 28176972 |
| <b>CTTACCTTCA</b> | <b>TTAAAATTAA</b> | <b>CATGAATTTA</b> | <b>ATATTAAATA</b> | <b>ACTAATAGTG</b> | 28176922 |
| <b>CAAAGAGCAA</b> | <b>GATGTTAATA</b> | <b>AAATAGCATG</b> | <b>TTGAAATTTT</b> | <b>TGTATATAAC</b> | 28176872 |
| <b>TTATACACTT</b> | <b>TTCTTTTTTT</b> | <b>TTTTAATAAT</b> | <b>AGAGACATGG</b> | <b>TCTTGTTATA</b> | 28176822 |
| <b>TTGcCcAAGT</b> | <b>TGGTTTCAAA</b> | <b>CTCCTGGGCT</b> | <b>CAATCATTCC</b> | <b>TCCCACCTGA</b> | 28176772 |
| <b>GCCTCCCAA</b>  | gtgctgggat        | tacagggatg        | agccaccaca        | cctggcctgg        | 28176722 |
| aatctaaatc        | tcaatagtta        | gatctgagtg        | ggaagataat        | aatttttatt        | 28176672 |
| ttcttcttta        |                   |                   |                   |                   |          |

## 4b5. MST1

### LTR-Chromosome junction sequence read

AGTGTGGAAAATCTCTAGCA**GTTCTCATTAAACA**ACTTAGAAAAAAGGCCAGGTGTGATGGCTTGCACCTGTAAACCC  
AACATTTTCAGGAGACCAAGGCAGGAGGATGACTTGAGGCCAGGAGTTCAAGAGCACCCCTGGTCAACAGAGAAAGACT  
CTGTCTCTACAGAAAAAATAAAAATTAGGCAGGCATGGTGGTACATGCAGTCCCAGTTTGGAGGCTGAGGCACCGAG  
ATTACTTAAGACCAGGAGTTT**GAGGTTACAGTAAGCCATGATTGCACCATTGC**ACTCCAGCCTGGGT

### Query sequence localized to chromosome 3 using BLAT

|                   |                    |                    |                   |                   |          |
|-------------------|--------------------|--------------------|-------------------|-------------------|----------|
| gagcttgcag        | tgagccaaga         | tcgtgccact         | gcactccagc        | ctgggcaaca        | 49761596 |
| gcgcgagact        | ccgtctcaaa         | aaaaaaaaaa         | aaaaaaatta        | ataacctaag        | 49761646 |
| <b>GTTCTCATT</b>  | <b>ACA</b> ACTTAGA | <b>AAAA</b> AGGCCA | <b>GGTGTGATGG</b> | <b>CTTGCACCTG</b> | 49761696 |
| <b>TAAACCCAAC</b> | <b>ATTT</b> CAGGAG | <b>ACCA</b> AGGCAG | <b>GAGGATGACT</b> | <b>TGAGGCCAGG</b> | 49761746 |
| <b>AGTTCAAGAG</b> | <b>CACCCTGGTC</b>  | <b>AACAGAGAAA</b>  | <b>GACTCTGTCT</b> | <b>CTACAGAAAA</b> | 49761796 |
| <b>AATgAAAATT</b> | <b>AGGCAGGCAT</b>  | <b>GGTGGTACAT</b>  | <b>GCAGTCCCAG</b> | <b>TTTGGAGGCT</b> | 49761846 |
| <b>GAGGCACCGA</b> | <b>GATTACTTAA</b>  | <b>GACCAGGAGT</b>  | <b>TTGAGGTTAC</b> | <b>AGTAAGCCAT</b> | 49761896 |
| <b>GATTGCACCA</b> | <b>TTGCACTCCA</b>  | <b>GCCTGGGTga</b>  | cagagtgaaa        | ccctgtctct        | 49761946 |
| ctctctttca        | tttatttttt         | ctggtgagat         | ggggtctcac        | tgttgcccat        | 49761996 |
| gctgaagtgg        | cctggcacga         | tcttggt            |                   |                   |          |

**Supplementary Table S1. Enriched gene classes near RIS in human SCID repopulating cells (P<0.01)**

| <b>Vector</b> | <b>Gene class</b>    | <b>No. of integrants</b> | <b>% of integrants</b> | <b>Benjamini value</b> |
|---------------|----------------------|--------------------------|------------------------|------------------------|
| FV            | phosphoprotein       | 169                      | 49.9                   | $1.7 \times 10^{-8}$   |
|               | alternative splicing | 167                      | 49.3                   | $2.1 \times 10^{-3}$   |
| LV            | phosphoprotein       | 156                      | 60.7                   | $2.4 \times 10^{-12}$  |
|               | alternative splicing | 152                      | 59.1                   | $9.2 \times 10^{-10}$  |
|               | splice variant       | 152                      | 59.1                   | $8.0 \times 10^{-9}$   |
|               | coiled coil          | 57                       | 22.2                   | $3.3 \times 10^{-6}$   |
|               | cytoplasm            | 74                       | 28.8                   | $1.8 \times 10^{-4}$   |
|               | acetylation          | 58                       | 22.6                   | $3.1 \times 10^{-3}$   |
|               | repressor            | 18                       | 7.0                    | $3.5 \times 10^{-3}$   |
|               | chromatin regulator  | 12                       | 4.7                    | $4.7 \times 10^{-3}$   |

**Supplementary Table S2.** FV and LV vector clones contributing to more than 20% of all RIS

| Vector | Mouse | Chr. | RIS       | Contribution to all RIS <sup>a</sup> | Closest proto-oncogene (within 100 kb) | Closest proto-oncogene (within 500 kb) |
|--------|-------|------|-----------|--------------------------------------|----------------------------------------|----------------------------------------|
| LV     | 6     | 22   | 40507529  | 99%                                  | Within <i>MKL1</i>                     | Within <i>MKL1</i>                     |
| LV     | 8     | 1    | 26500029  | 66%                                  | <i>RPS6KA1</i> (30 kb)                 | <i>RPS6KA1</i> (30 kb)                 |
| LV     | 1     | 12   | 123718848 | 63%                                  | n/a                                    | n/a                                    |
|        |       | 19   | 15447449  | 28%                                  | <i>CYP4F22</i> (61 kb)                 | <i>CYP4F22</i> (61 kb)                 |
| LV     | 3     | X    | 78694471  | 63%                                  | n/a                                    | <i>GPR174</i> (465,500 kb)             |
|        |       | 13   | 28176971  | 33%                                  | <i>FLT3</i> (76 kb)                    | <i>FLT3</i> (76 kb)                    |
| FV     | 5     | X    | 36964413  | 39%                                  | n/a                                    | n/a                                    |
|        |       | 22   | 30608050  | 27%                                  | n/a                                    | <i>SEC14L3</i> (136,003 kb)            |
| LV     | 4     | 9    | 137093265 | 34%                                  | n/a                                    | <i>MAMDL4</i> (240,899 kb)             |
|        |       | 4    | 39714912  | 22%                                  | n/a                                    | <i>RHOH</i> (476,098 kb)               |
| LV     | 5     | 3    | 49761647  | 30%                                  | <i>MST1</i> (73 kb)                    | <i>MST1</i> (73 kb)                    |
|        |       | 9    | 122215765 | 25%                                  | n/a                                    | <i>ORIJ2</i> (295,036 kb)              |
| LV     | 2     | 2    | 238004311 | 23%                                  | n/a                                    | <i>LRRFIP1</i> (376,731 kb)            |
|        |       | 5    | 122826778 | 22%                                  | n/a                                    | n/a                                    |
| LV     | 7     | 1    | 207939040 | 22%                                  | n/a                                    | <i>MIR29B2</i> (136,517 kb)            |
| FV     | 6     | 4    | 106716013 | 20%                                  | n/a                                    | <i>DKK2</i> (320,283 kb)               |

Abbreviations: Chr., chromosome, RIS, retroviral integration site, n/a, not applicable

<sup>a</sup>capture frequency per mouse
